# Supplementary material
Source: bioRxiv or medRxiv preprint supplement (https://www.biorxiv.org/highwire/filestream/39051/field_highwire_adjunct_files/0/132563-1.pdf)
Supplement: Supplementary file [file 132563-1.pdf]

## Translating GWAS findings into therapies for depression and anxiety disorders: Drug repositioning using gene-set analyses and testing for enrichment of psychiatric drug classes

### Supplementary Tables

Supplementary Table 1 Enrichment *p*-values of repositioning hits derived from GWAS of major depressive disorder (MDD) and depressive symptoms

| Disorder                       | MDD-CON         | MDD-CON         | MDD-PGC  | MDD-PGC  | DepSym          | DepSym          |
|--------------------------------|-----------------|-----------------|----------|----------|-----------------|-----------------|
|                                | Self            | Compet          | Self     | Compet   | Self            | Compet          |
| <i>ATC classification</i>      |                 |                 |          |          |                 |                 |
| Antipsychotics                 | <b>5.76E-04</b> | <b>1.57E-02</b> | 1.00E+00 | 1.00E+00 | <b>2.51E-03</b> | <i>5.74E-02</i> |
| Antidepressants or anxiolytics | <b>7.80E-06</b> | <b>1.51E-03</b> | 1.00E+00 | 1.00E+00 | <b>2.52E-02</b> | 4.04E-01        |
| All ATC psychiatric drugs      | <b>2.48E-07</b> | <b>3.14E-03</b> | 1.00E+00 | 1.00E+00 | <b>2.41E-06</b> | <b>1.35E-02</b> |
| <i>MEDI-HPS</i>                |                 |                 |          |          |                 |                 |
| Schizophrenia and Bipolar      | <b>1.59E-06</b> | <b>4.76E-04</b> | 1.00E+00 | 1.00E+00 | <b>3.77E-02</b> | 5.46E-01        |
| Anxiety and Depression         | <b>1.59E-06</b> | <b>1.32E-03</b> | 1.00E+00 | 1.00E+00 | <b>3.54E-03</b> | 2.40E-01        |
| All psychiatric drugs          | <b>2.30E-09</b> | <b>1.23E-04</b> | 1.00E+00 | 1.00E+00 | <b>2.51E-03</b> | 3.72E-01        |
| <i>ClinicalTrial.gov</i>       |                 |                 |          |          |                 |                 |
| Anxiety disorders              | <b>1.62E-06</b> | <b>3.64E-03</b> | 1.00E+00 | 1.00E+00 | <b>1.03E-03</b> | 1.40E-01        |
| Depression                     | <b>4.00E-06</b> | <b>2.99E-02</b> | 1.00E+00 | 1.00E+00 | <b>1.54E-04</b> | 1.08E-01        |
| Bipolar disorder               | <b>2.90E-03</b> | 2.02E-01        | 1.00E+00 | 1.00E+00 | <b>4.78E-05</b> | <b>1.32E-02</b> |
| Schizophrenia                  | <b>1.49E-04</b> | 1.18E-01        | 1.00E+00 | 1.00E+00 | <b>1.23E-04</b> | 1.16E-01        |
| Anxiety + Depression           | <b>2.86E-08</b> | <b>2.96E-03</b> | 1.00E+00 | 1.00E+00 | <b>3.86E-05</b> | <i>7.67E-02</i> |
| Schizophrenia + Bipolar        | <b>7.95E-05</b> | 1.13E-01        | 1.00E+00 | 1.00E+00 | <b>2.32E-06</b> | <b>1.25E-02</b> |
| All psychiatric drugs          | <b>1.39E-09</b> | <b>2.63E-03</b> | 1.00E+00 | 1.00E+00 | <b>4.41E-08</b> | <b>2.02E-02</b> |

Self: self-contained test; Compet, competitive test. Test results with *q*-value < 0.05 are in bold. Results with *q*-value between 0.05 and 0.1 are in italics. MDD-CONVERGE, MDD with GWAS data from the CONVERGE Consortium; MDD-PGC, MDD with GWAS data from the Psychiatric Genomics Consortium; DepSym, GWAS of depressive symptoms from the Social Science Genetics Association Consortium (SSGAC).

Supplementary Table 2 Enrichment p-values of repositioning hits derived from GWAS of anxiety disorders and neuroticism

| Disorder                       | AnxietyCC<br>Self | AnxietyCC<br>Compet | Neurotic<br>Self | Neurotic<br>Compet |
|--------------------------------|-------------------|---------------------|------------------|--------------------|
| <i>ATC classification</i>      |                   |                     |                  |                    |
| Antipsychotics                 | <b>2.96E-03</b>   | <b>9.57E-04</b>     | <b>2.20E-09</b>  | <b>2.28E-09</b>    |
| Antidepressants or anxiolytics | <b>1.85E-02</b>   | <b>8.00E-03</b>     | <b>2.07E-03</b>  | <b>2.64E-03</b>    |
| All ATC psychiatric drugs      | <b>1.00E-02</b>   | <b>1.54E-03</b>     | <b>1.50E-10</b>  | <b>1.91E-10</b>    |
| <i>MEDI-HPS</i>                |                   |                     |                  |                    |
| Schizophrenia and Bipolar      | <b>1.11E-02</b>   | <b>3.81E-03</b>     | <b>5.22E-06</b>  | <b>7.67E-06</b>    |
| Anxiety and Depression         | <b>1.18E-02</b>   | <b>4.00E-03</b>     | <b>1.58E-04</b>  | <b>2.22E-04</b>    |
| All psychiatric drugs          | <b>9.06E-04</b>   | <b>1.12E-04</b>     | <b>6.19E-07</b>  | <b>1.04E-06</b>    |
| <i>ClinicalTrial.gov</i>       |                   |                     |                  |                    |
| Anxiety disorders              | <b>3.72E-02</b>   | <b>1.16E-02</b>     | <b>4.35E-03</b>  | <b>5.89E-03</b>    |
| Depression                     | <b>1.61E-02</b>   | <b>2.77E-03</b>     | 1.08E-01         | 1.38E-01           |
| Bipolar disorder               | <b>2.10E-02</b>   | <b>5.49E-03</b>     | <b>8.99E-03</b>  | <b>1.16E-02</b>    |
| Schizophrenia                  | <b>5.48E-03</b>   | <b>7.71E-04</b>     | <b>1.86E-03</b>  | <b>2.65E-03</b>    |
| Anxiety + Depression           | <b>2.38E-02</b>   | <b>3.82E-03</b>     | <i>5.28E-02</i>  | <i>7.25E-02</i>    |
| Schizophrenia + Bipolar        | <b>4.98E-03</b>   | <b>6.12E-04</b>     | <b>1.09E-03</b>  | <b>1.53E-03</b>    |
| All psychiatric drugs          | <b>1.18E-02</b>   | <b>8.01E-04</b>     | <b>3.64E-03</b>  | <b>5.29E-03</b>    |

Self: self-contained test; Compet, competitive test. Test results with  $q$ -value  $< 0.05$  are in bold. Results with  $q$ -value between 0.05 and 0.1 are in italics. Anxiety CC, GWAS of anxiety disorders case-control sample; neurotic, GWAS of neuroticism in general population.

Supplementary Table 3 Enrichment p-values of repositioning hits derived from meta-analysis of GWAS *p*-values from MDD-CONVERGE, MDD-PGC, SSGAC-DS and SSGAC-NEU

| Disorder                       | Brown Self      | Brown Compet    | Simes Self      | Simes Compet    |
|--------------------------------|-----------------|-----------------|-----------------|-----------------|
| <i>ATC classification</i>      |                 |                 |                 |                 |
| Antipsychotics                 | <b>2.21E-08</b> | <b>3.89E-06</b> | <b>2.28E-06</b> | <b>2.96E-05</b> |
| Antidepressants or anxiolytics | <b>8.39E-09</b> | <b>1.14E-05</b> | <b>1.14E-06</b> | <b>3.06E-05</b> |
| All ATC psychiatric drugs      | <b>4.57E-16</b> | <b>3.59E-09</b> | <b>1.91E-10</b> | <b>2.30E-07</b> |
| <i>MEDI-HPS</i>                |                 |                 |                 |                 |
| Schizophrenia and Bipolar      | <b>3.46E-07</b> | <b>1.54E-04</b> | <b>2.36E-05</b> | <b>4.29E-04</b> |
| Anxiety and Depression         | <b>2.28E-09</b> | <b>1.14E-05</b> | <b>5.34E-06</b> | <b>2.22E-04</b> |
| All psychiatric drugs          | <b>1.43E-11</b> | <b>1.57E-06</b> | <b>1.45E-07</b> | <b>2.23E-05</b> |
| <i>ClinicalTrial.gov</i>       |                 |                 |                 |                 |
| Anxiety disorders              | <b>2.48E-07</b> | <b>9.80E-04</b> | <b>4.68E-04</b> | <b>1.11E-02</b> |
| Depression                     | <b>4.64E-09</b> | <b>8.38E-04</b> | <b>4.30E-06</b> | <b>1.24E-03</b> |
| Bipolar disorder               | <b>4.57E-08</b> | <b>1.91E-04</b> | <b>3.67E-06</b> | <b>1.91E-04</b> |
| Schizophrenia                  | <b>2.28E-09</b> | <b>2.35E-04</b> | <b>7.74E-06</b> | <b>9.83E-04</b> |
| Anxiety + Depression           | <b>1.50E-10</b> | <b>1.21E-04</b> | <b>3.46E-07</b> | <b>2.00E-04</b> |
| Schizophrenia + Bipolar        | <b>1.16E-10</b> | <b>2.06E-05</b> | <b>3.67E-07</b> | <b>9.16E-05</b> |
| All psychiatric drugs          | <b>1.12E-14</b> | <b>4.00E-06</b> | <b>3.57E-09</b> | <b>1.70E-05</b> |

Self: self-contained test; Compet, competitive test. Test results with *q*-value < 0.05 are in bold. Results with *q*-value between 0.05 and 0.1 are in italics.
